# Supplementary material
Source: Springer Nature journal article supplement (https://www.springermedizin.de/resource/supplementary/13047_2013_573_MOESM2_ESM.pdf/9663996)

| Study ID        | Effect | 95% CI |       |
|-----------------|--------|--------|-------|
|                 |        | Lower  | Upper |
| Armstrong 1997b | 5.60   | 4.80   | 6.40  |
| Armstrong 2007  | 2.76   | 2.48   | 3.04  |
| Armstrong 1997a | 4.50   | 2.74   | 6.26  |
| Armstrong 2003  | 0.60   | 0.38   | 0.82  |
| Armstrong 1996  | 6.90   | 5.30   | 8.50  |
| Stess 1988      | 1.39   | -3.24  | 6.01  |
| Benbow 1994a    | 4.50   | 2.23   | 6.77  |
| Benbow 1994b    | -0.18  | -2.16  | 1.80  |

Summary effect: 3.36 95% CI (1.86, 4.86)

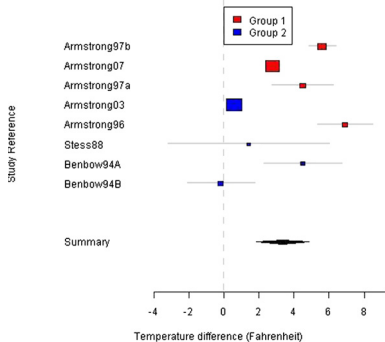

Supplement: MOESM2 [file 9663996]
